# Supplementary material for: The role of embedded research in quality improvement: a narrative review
Source: PubMed Central journal article supplement (PMC5256405; doi:10.1136/bmjqs-2015-004877), 2016-04-29
Supplement: bmjqs-2015-004877supp_Appendix.pdf [file bmjqs-2015-004877supp_Appendix.pdf]

Appendix 1: Categories used in RedCap data extraction form

| <b>Categories used in RedCap data extraction form</b> |
|-------------------------------------------------------|
| Lead author                                           |
| Country                                               |
| Year                                                  |
| Sector                                                |
| Type of article                                       |
| Definition of embedded research                       |
| Characteristics of embedded research/researcher       |
| Benefits of the embedded researcher role              |
| Limitations of the embedded researcher role           |
| Challenges of embedded research                       |
| Strategies to deal with challenges                    |
| Lessons learned                                       |
